# Supplementary material for: Luteolin Inhibits Tumorigenesis and Induces Apoptosis of Non-Small Cell Lung Cancer Cells via Regulation of MicroRNA-34a-5p
Source: PubMed Central journal article supplement (PMC5855669; doi:10.3390/ijms19020447), 2018-02-02
Supplement: ijms-19-00447-s001.pdf [file ijms-19-00447-s001.pdf]

mmu-mR-16-6p  
mmu-mR-23-9p  
\*\*\*mmu-mR-25-5p, mmu-mR-28\*\*\*  
mmu-mR-34-4p  
mmu-mR-108-2p  
mmu-mR-31-4p  
mmu-mR-7-8p  
mmu-mR-30-3p  
mmu-mR-27-2p  
mmu-mR-1-5p  
mmu-mR-32-3p  
mmu-mR-34-3p  
mmu-mR-30a-5p  
mmu-mR-130-1p  
mmu-mR-704-2p  
mmu-mR-37-3p  
mmu-mR-130b-1p  
mmu-mR-1-2-5p  
mmu-mR-23-2p  
mmu-mR-1-9p  
mmu-mR-271-2p  
mmu-mR-1012-5p  
mmu-mR-3063-1p  
mmu-mR-209-2p  
mmu-mR-7649-5p  
mmu-mR-150b-1p  
mmu-mR-71-5p  
mmu-mR-860b-5p  
mmu-mR-49-5p  
mmu-mR-24-2p  
mmu-mR-14-2p  
mmu-mR-19b-5p  
mmu-mR-6901-5p  
mmu-mR-181b-1p  
mmu-mR-632-5p  
mmu-mR-27a-3p  
mmu-mR-21-7p  
mmu-mR-82-5p  
mmu-mR-24-2p  
mmu-mR-29a-3p  
mmu-mR-3102-1p  
mmu-mR-21-1-3p  
mmu-mR-7-2-1p  
mmu-mR-903-5p  
mmu-mR-700-4p  
mmu-mR-22-3p  
mmu-mR-222-3p  
mmu-mR-57-5p  
mmu-mR-89-5p  
mmu-mR-76-5p  
mmu-mR-10-5p  
mmu-mR-30-5p  
mmu-mR-7-5-5p  
mmu-mR-85-5p  
mmu-mR-100-5p  
mmu-mR-9-5p  
mmu-mR-7-6-5p  
mmu-mR-42-5p  
mmu-mR-602-5p  
mmu-mR-31-5p  
mmu-mR-468-5p  
mmu-mR-351-3p  
mmu-mR-158-5p  
mmu-mR-34-5p  
mmu-mR-819-5p  
mmu-mR-102-4p  
mmu-mR-540-1p  
mmu-mR-30-3-3p  
mmu-mR-21-4-5p  
mmu-mR-10a-5p  
mmu-mR-1077-5p  
mmu-mR-125b-5p  
mmu-mR-93-5p  
mmu-mR-6398  
mmu-mR-714-5p  
mmu-mR-80a-5p  
mmu-mR-13-2p  
mmu-mR-15a-5p  
mmu-mR-20-5p  
mmu-mR-125b-3p  
mmu-mR-5713  
mmu-mR-181-5p  
\*\*\*mmu-mR-466a-5p, mmu-mR-466b-5p\*\*\*  
mmu-mR-451a  
mmu-mR-632  
mmu-mR-238-5p  
mmu-mR-703b-5p  
mmu-mR-20-5p  
mmu-mR-71-5p  
mmu-mR-100b-5p  
mmu-mR-8241  
mmu-mR-844  
mmu-mR-8102  
mmu-mR-803-5p  
mmu-mR-17-3p  
mmu-mR-248-5p  
mmu-mR-181a-4p  
mmu-mR-271  
mmu-mR-665-2p  
mmu-mR-265-5p  
mmu-mR-6941-5p  
mmu-mR-67-2p  
mmu-mR-141-5p  
mmu-mR-308-5p  
mmu-mR-7  
mmu-mR-102-3p  
mmu-mR-70-3p  
mmu-mR-15-3p  
mmu-mR-138-5p  
mmu-mR-900-5p  
mmu-mR-108a-5p  
mmu-mR-808-5p  
mmu-mR-741-5p  
mmu-mR-697-5p  
mmu-mR-650-5p  
mmu-mR-120-3p  
mmu-mR-181-5p  
mmu-mR-6348  
mmu-mR-75-5p  
mmu-mR-6802-5p  
mmu-mR-8119  
mmu-mR-3801  
mmu-mR-9530  
mmu-mR-210-3p  
mmu-mR-700-5p  
mmu-mR-17-5p  
mmu-mR-692-5p  
mmu-mR-51-3p  
\*\*\*mmu-mR-466a-5p, mmu-mR-466b-5p\*\*\*  
mmu-mR-26-5p  
mmu-mR-309-5p  
mmu-mR-701-5p  
mmu-mR-204-5p  
mmu-mR-764-3p  
mmu-mR-469-5p  
mmu-mR-379-5p  
mmu-mR-469b-5p  
mmu-mR-304-3p  
mmu-mR-25-3p  
mmu-mR-20-2-3p  
mmu-mR-1970  
mmu-mR-7677-5p  
mmu-mR-6913-5p  
mmu-mR-22a-3p  
mmu-mR-301-5p  
mmu-mR-3908  
mmu-mR-923-3p  
mmu-mR-1883  
mmu-mR-803  
mmu-mR-203-1-3p  
mmu-mR-208-5p  
mmu-mR-43-5p  
mmu-mR-5-3p  
mmu-mR-892  
mmu-mR-198a-3p  
mmu-mR-34-3p  
mmu-mR-3472  
mmu-mR-2112-1-3p  
mmu-mR-3105-2p  
mmu-mR-300-3p  
mmu-mR-469  
mmu-mR-609  
mmu-mR-301-3p  
mmu-mR-308-5p  
mmu-mR-410b  
mmu-mR-3473a  
mmu-mR-61-2p  
mmu-mR-6904-5p  
mmu-mR-348-5p  
mmu-mR-5721  
mmu-mR-222-1p  
mmu-mR-6238  
mmu-mR-2471  
mmu-mR-3470a  
mmu-mR-761-5p  
mmu-mR-1247-1p  
mmu-mR-7-2p  
mmu-mR-110-3p  
mmu-mR-480-2p  
mmu-mR-330-3p  
mmu-mR-92a-2-5p  
mmu-mR-127-2p  
\*\*\*mmu-mR-466c-3p, mmu-mR-466c-3p, mmu-mR-466c-3p\*\*\*  
mmu-mR-1084-5p  
mmu-mR-270b-2p  
mmu-mR-6921-5p  
mmu-mR-3547-3p  
mmu-mR-51-0  
mmu-mR-485-3p  
mmu-mR-203-5p  
mmu-mR-1195  
mmu-mR-190b  
mmu-mR-7667-3p  
mmu-mR-764-5p  
mmu-mR-101b-1-3p  
mmu-mR-3060-1p  
mmu-mR-214-3p  
mmu-mR-3473b  
mmu-mR-724-2p  
mmu-mR-489-5p  
mmu-mR-607-3p  
mmu-mR-1181b-3p  
mmu-mR-1002-1p  
mmu-mR-120b-1-3p  
mmu-mR-7671-5p  
mmu-mR-602b-3p  
mmu-mR-706  
mmu-mR-225-3p  
\*\*\*mmu-mR-660a-3p, mmu-mR-660b-3p\*\*\*  
mmu-mR-1102  
mmu-mR-3904  
mmu-mR-638-5p  
mmu-mR-83-5p  
mmu-mR-147-5p  
mmu-mR-1224-2p  
mmu-mR-7074-3p  
mmu-mR-7020-3p  
mmu-mR-6348  
mmu-mR-6240-5p  
mmu-mR-7648-5p  
mmu-mR-6648-2p  
mmu-mR-6909-3p  
mmu-mR-424-5p  
mmu-mR-574b  
mmu-mR-6408  
mmu-mR-603-3p  
mmu-mR-51-8  
mmu-mR-728-4p  
mmu-mR-3473b

Figure S1. Heatmap represented the expression values of miRNAs that were differentially expressed in LTL high dose group (200 mg/kg) compared with the control group by microarray analysis of H460 tumor xenografts.
